# Supplementary material for: Arpp19 Promotes Myc and Cip2a Expression and Associates with Patient Relapse in Acute Myeloid Leukemia
Source: Cancers (Basel). 2019 Nov 11;11(11):1774. doi: 10.3390/cancers11111774 (PMC6895887; doi:10.3390/cancers11111774)
Supplement: Supplementary file 1 [file cancers-11-01774-s001.zip › cancers-635461-final-Supplementary tables 1-7.xlsx]

## Sheet: Table S1
Table S1. Clinical and molecular characteristics of 80 patients with AML (cohort1)
Characteristic	No. (%)
Sex
Male	39 (49)
Female	41 (51)
Age
≤ 60 years	67 (84)
> 60 years	13 (16)
Complete remission
No	12 (15)
Yes	68 (85)
Diagnosis
AML-M0	5 (6)
AML-M1	21 (26)
AML-M2	12 (15)
AML-M3	0 (0)
AML-M4	7 (9)
AML-M5	15 (19)
AML-M6	1 (1)
AML-M7	1 (1)
Not specified	18 (23)
Cytogenetic group (AML 2012)
Favorable	21 (26)
Intermediate	37 (46)
Adverse	22 (28)
Normal karyotype
No	50 (63)
Yes	30 (37)
Secondary AML
No	61 (76)
Yes	19 (24)
Extramedullary disease
No	71 (89)
Yes	9 (11)
FLT3-ITD
No	67 (84)
Yes	10 (12)
Not analyzed	3 (4)
NPM1 mutated
No	58 (72)
Yes	19 (24)
Not analyzed	3 (4)
FLT3-ITD and NPM1 co-association
FLT3-ITD+, NPM1mutation+	6 (8)
FLT3-ITD+, NPM1mutation-	4 (5)
FLT3-ITD-, NPM1mutation+	13 (16)
FLT3-ITD-, NPM1mutation-	54 (67)
Not analyzed	3 (4)

## Sheet: Table S2
Table S2. Risk stratification that was applied in retrospective analyses (modified from European LeukemiaNet; Döhner et al. 2010)
Favorable
t(8;21)
Inv(16)/t(16;16)
Normal karyotype and NPM1 mutation without FLT3-ITD
Intermediate
Normal karyotype without NPM1 mutation and FLT3-ITD
Normal karyotype with NPM1 mutation and FLT3-ITD
Cytogenetic abnormaltied not classified as favourable or adverse
Adverse
Inv(3)/t(3;3)
t(6;9)
t(v;11)
-5, del(5q), -7, del(7q), abn(17p)
t(9;22)
Normal karyotype with FLT3-ITD
Complex karyotype (≥3 chromosome abnormalities)
Monosomal karyotype (≥2 monosomies or single monosomy with structural abnormality)

## Sheet: Table S3
Table S3. Chemotherapy according to AML92 and AML2003 protocols
AML92	Days		AML2003	Days
1. IAT			1. IdAraC-Ida vesrus IAT
Idarubicin 12 mg/m2	1, 3, 5		Cytarabine 1 g/m2	1-4
Cytarabine 100 mg/m2	1-9		Idarubicin 12 mg/m2	5-7
Thioguanine 75 mg/m2	1-9		(2nd induction MEA)
2. HDAraC-Ida			2. HDAraC-Ida
Cytarabine 1,5 mg/m2 every 12h	1-5		Cytarabine 1,5 mg/m2 every 12h	1-4
Idarubicin 8 mg/m2	6-8		Idarubicin 8 mg/m2	5-7
3. MEA			3. Mito-IdAraC
Mitoxantrone 12 mg/m2	2-5		Mitoxantrone 12 mg/m2	2-5
Etoposide 100 mg/m2	1-4		Cytarabine 1-1.5 g/m2 every 12h	1-4
Cytarabine 1 g/m2 every 12h	1-4
			4. MACE
4. Amsa-HDAraC			Amsacrine 100 mg/m2	1-(4)5
Amsacrine 115 mg/m2	1-5		Cytarabine 100-200 mg/m2	1-5
Cytarabine 3 g/m2 every 12h	1-2		Etoposide 100 mg/m2	1-5
5. HDAraC-Ida			5. IAE
If 2 induction cycles			If 2 induction cycles

## Sheet: Table S4
Table S4. Clinical and molecular characteristics of nine patients with AML (cohort2)
Characteristic	No. (%)
Sex
Male	4 (44)
Female	5 (56)
Age
≤ 60 years	5 (56)
> 60 years	4 (44)
Complete remission
No	0 (0)
Yes	9 (100)
Cytogenetic group (AML 2012)
Favorable	3 (33)
Intermediate	4 (45)
Adverse	2 (22)
Allogeneic HSCT
No	5 (56)
Yes	4 (44)
Relapse
No	1 (11)
Yes	8 (89)
FLT3-ITD
No	5 (56)
Yes	2 (22)
Unknown	2 (22)
NPM1 mutated
No	2 (22)
Yes	4 (45)
Unknown	3 (33)
FLT3-ITD and NPM1 co-association
FLT3-ITD+, NPM1mutation+	1 (11)
FLT3-ITD+, NPM1mutation-	0 (0)
FLT3-ITD-, NPM1mutation+	3 (33)
FLT3-ITD-, NPM1mutation-	2 (23)
Not analyzed	3 (33)

## Sheet: Table S5
Table S5. Primer and probe sequences used in this study for qPCR analysis
Target	Forward primer	Probe	Reverse primer
CIP2A	cagtctggactgagaatattattgga	tccactgc*	ggcattgtttgctgctatacttt
PPME1	acaggtttgcagaacccatc	tccagtgt*	ggacagcaggtcactaacagc
ARPP19	cagagggagcactatgtctgc	aggagcag*	gcttttaattttgcttcttctgct
TIPRL	catgatgatccacggcttc	ggccctgg*	tcagggagagatggcatatgta
EVI1 (MECOM)	agtgccctggagatgagttg	ccccagtgaggtataaagagga	tttgaggctatctgtgaagtgc
WT1	gggcgtgtgaccgtagct	agcacggtcaccttcgacggg	cgctattcgcaatcagggtta
b-actin	tcacccacacrgtgcccatctacgc	atgccctcccccatgccatcctgcgt	cagcggaaccgctcattgccaatgg
GAPDH	acccactcctccacctttga	acgaccactttgtcaagctcatttcctggt	ttgctgtagccaaattcgttgt
For SET detection, custom TaqMan® gene expression assay AIY9AXG (Thermo Fisher Scientific) was used.
* Roche Universal ProbeLibrary (UPL) probe

## Sheet: TableS6
Table S6. Overexpression of WT1, EVI1, SET, TIPRL, ARPP19,
CIP2A and PME1 in 80 patients with AML (cohort1)
Target	Median	Quartiles	Overexpression in patient cohort No. (%)	FC > 2 No. (%)
WT1	63.3	9.68, 151.3	73 (91)	70 (88)
EVI1	0.003	0.001, 0.067	10 (13)	9 (11)
SET	0.8	0.64, 1.08	24 (30)	6 (8)
TIPRL	0.84	0.65, 1.07	23 (30)	1 (1)
ARPP19	0.62	0.48, 0.91	16 (21)	3 (4)
CIP2A	0.35	0.18, 0.5	3 (4)	0 (0)
PME1	0.27	0.18, 0.48	3 (4)	1 (1)

## Sheet: Table S7
Table S7. Clinical and genetic characteristics of AML patients according to ARPP19 expression (cohort1)
ARPP19 categorical expression
	ARPP19low		ARPP19high
Characteristic	Median (range)	No. (%)	Median (range)	No. (%)	p
Overall		60 (79)		16 (21)
Sex
Male		31 (52)		5 (31)	ns
Female		29 (48)		11 (69)
Age	50 (18-64)		49 (24-65)		ns
Complete remission
No		7 (12)		4 (25)	ns
Yes		53 (88)		12 (75)
Diagnosis
AML-M0		3 (5)		2 (12.5)	0.02
AML-M1		11 (18)		10 (62.5)
AML-M2		10 (17)		2 (12.5)
AML-M3		0 (0)		0 (0)
AML-M4		7 (12)		0 (0)
AML-M5		15 (25)		0 (0)
AML-M6		1 (1.5)		0 (0)
AML-M7		1 (1.5)		0 (0)
Not specified		12 (20)		2 (12.5)
Cytogenetic group (AML 2012)
Favorable		15 (25)		6 (38)	ns
Intermediate		30 (50)		5 (31)
Adverse		15 (25)		5 (31)
Normal karyotype
No		42 (70)		5 (31)	0.005
Yes		18 (30)		11 (69)
Secondary AML
No		46 (77)		13 (81)	ns
Yes		14 (23)		3 (19)
Extramedullary disease
No		52 (87)		15 (94)	ns
Yes		8 (13)		1 (6)
FLT3-ITD
No		52 (87)		13 (81)	ns
Yes		6 (10)		3 (19)
Not analyzed		2 (3)		0 (0)
NPM1 mutated
No		48 (80)		7 (44)	0.002
Yes		10 (17)		9 (56)
Not analyzed		2 (3)		0 (0)
FLT3-ITD and NPM1 co-association
FLT3-ITD+, NPM1mutation+		3 (5)		3 (19)	0.03
FLT3-ITD+, NPM1mutation-		3 (5)		0 (0)
FLT3-ITD-, NPM1mutation+		7 (12)		6 (37)
FLT3-ITD-, NPM1mutation-		45 (75)		7 (44)
Not analyzed		2 (3)		0 (0)
